1 **“Someone who hates themselves doesn’t come for their drugs”:** Experiences of Mental  
2 **Health Along the HIV Care Continuum in South-Central, Uganda**

3  
4 **Authors**

5  
6 Nora S. West<sup>1</sup>, William Ddaaki<sup>2</sup>, Sarah M. Murray<sup>3</sup>, Neema Nakyanjo<sup>2</sup>, Dauda Isabirye<sup>2</sup>,  
7 Rosette Nakubulwa<sup>2</sup>, Fred Nalugoda<sup>2</sup>, Pamela J. Surkan<sup>4</sup>, Heidi E. Hutton<sup>5</sup>, Caitlin E. Kennedy<sup>4</sup>

8  
9 <sup>1</sup> Division of Pulmonary and Critical Care Medicine, University of California San Francisco, San Francisco CA USA

10 <sup>2</sup> Rakai Health Sciences Program, Kalisizo, Uganda

11 <sup>3</sup> Department of Mental Health, Johns Hopkins Bloomberg School of Public Health, Baltimore, MD, USA

12 <sup>4</sup> Department of International Health, Social and Behavioral Interventions Program, Johns Hopkins Bloomberg School of Public  
13 Health, Baltimore, MD, USA

14 <sup>5</sup> Division of Psychiatry and Behavioral Sciences, Johns Hopkins School of Medicine, Baltimore, MD, USA

15  
16 **Corresponding Author:** Nora S. West

17  
18 **Running title:** Mental Health Along the HIV Care Continuum

19  
20 **Key words:** HIV, mental health, qualitative research, continuum of care, Africa

21  
22 **Word count:** 3584

23  
24 **ABSTRACT**

25  
26 Poor mental health occurs more frequently among people living with HIV. Understanding what  
27 mental health problems occur and at what point during the continuum of HIV care is critical to  
28 ensure these problems are identified and appropriately addressed. We explored how mental  
29 health is experienced along the HIV care continuum in Rakai, Uganda.

30  
31 We conducted in-depth interviews with 20 adults living with HIV and 10 health workers.  
32 Interviews followed a timeline approach. Responses were analyzed using content analysis.

33  
34 At the time of HIV diagnosis, nearly all participants described a range of strong emotions,  
35 including shock, fear and intense worry. Most participants described continued fear and intense  
36 worry leading up to, and at the time of, ART initiation. However, they said these emotions often  
37 subside after ART is initiated and viral suppression is achieved. Across interviews and at  
38 multiple points of the continuum, participants discussed how fear and worry led individuals to be  
39 “thinking too much” or be in “deep thoughts” and experience self-hatred. Individuals who  
40 stopped taking ART were thought to have more severe mental health problems (madness,  
41 psychosis, suicidality). Participants were divided about the mental health of persons who  
42 returned to care after disengagement.

43  
44 In this setting, mental health problems experienced by people living with HIV are dynamic  
45 across the care continuum. With expanded HIV testing campaigns and Universal Test and Treat  
46 policies, targeted interventions for psychosocial support at the time of testing and ART initiation  
47 remain critical.

48

## 49 INTRODUCTION

50

51 HIV persists as a leading cause of death in sub-Saharan Africa (SSA) [1], highlighting a  
52 continued urgent need to address the factors that contribute to poor outcomes for people living  
53 with HIV [2]. HIV prevalence in Uganda is 5.9% nationally [3] but significantly higher in the  
54 predominantly rural Rakai region where median prevalence ranges from 14% in agrarian  
55 communities to 42% in fishing communities [4, 5]. There remains a pressing need to both  
56 effectively manage the health of people already living with HIV and prevent new infections in the  
57 Rakai setting.

58 The HIV care continuum is an HIV care and treatment framework that depicts the often bi-  
59 directional spectrum from HIV diagnosis, linkage to care, retention in care, and viral suppression  
60 [6]. In the modern treatment era of Universal Test and Treat (UTT) all newly HIV diagnosed  
61 individuals are eligible for ART regardless of CD4 count. In this modern era, Hecce et al. further  
62 conceptualized the linkage to care step as a multifaceted stage of the continuum, inclusive of  
63 post-test counselling, care transfer, clinical assessment, ART initiation, counselling and support,  
64 and first follow-up – suggesting it is not as brief or simple a step as it might appear [7].

65 Evidence from SSA demonstrates that poor mental health, inclusive of symptoms or  
66 diagnosis of a mental disorder or disorders, occurs more frequently among people living with  
67 HIV than the general population [8-11]. In addition to being common, poor mental health and  
68 psychological distress among people living with HIV often go unrecognized and have  
69 deleterious impacts on further HIV transmission and treatment outcomes [12]. Beyond the  
70 impact on general wellbeing for people living with HIV, poor mental health and HIV-related  
71 stigma are linked to engagement in risk behaviors including delayed care seeking, decreased  
72 medication adherence, and poor retention in care among people living with HIV in low- and  
73 middle-income countries (LMICs) [8, 9, 11, 13-20]. Despite this important evidence, a clear  
74 picture of both the types of poor mental health that occur and the mental health trajectories

75 within and across the continuum in the modern treatment era (i.e. since the adoption of UTT  
76 policies) is lacking. UTT critically ensures that all people living with HIV can access lifesaving  
77 treatment. However, there is evidence that individuals initiated immediately after HIV diagnosis  
78 (i.e. same day) may have worse treatment outcomes than individuals who are initiated slightly  
79 later (i.e. within 2 weeks following diagnosis), suggesting there may be nuance in the time and  
80 support individuals need following HIV diagnosis [21, 22]. In the SSA setting of readily available  
81 and rapidly initiated ART, the impact of mental health on achieving favorable HIV treatment  
82 outcomes is still largely unknown. Further, studies from SSA in the UTT-era typically explore  
83 mental health at just one or two steps of the continuum, and often focus only on symptoms of a  
84 singular disorder (primarily depression) [23]. This evidence gap needs to be addressed.  
85 Additionally, understanding the timing and spectrum of mental health problems, and how they  
86 may wax and wane along the HIV care continuum, is important for developing tailored and  
87 timely interventions. This comprehensive understanding of mental health along the HIV care  
88 continuum may be critical to achieving optimal mental health and HIV treatment outcomes and  
89 is absent in the literature from SSA. We used qualitative research to explore how mental health  
90 is experienced along the HIV care continuum in Rakai, Uganda.

## 91 **MATERIALS AND METHODS**

92

### 93 *Study Setting and Population*

94

95 From March 2020 to December 2020, we conducted semi-structured in-depth interviews  
96 (IDIs) with people living with HIV and health workers in Rakai, south-central Uganda. Adults  
97 living with HIV (ages 18-49) were recruited from participants in recent rounds of the Rakai  
98 Community Cohort Study (RCCS), an open ongoing population-based cohort study across 40  
99 predominantly rural communities in the Rakai region, who had previously agreed to be

100 recontacted for future studies [4]. We purposively sampled participants for our study to achieve  
101 balance in time since HIV diagnosis, based on available data from the RCCS (diagnosis  $\leq$ 18  
102 months or >18 months ago), and gender. Health workers who regularly provide care to people  
103 living with HIV and who were employed by any of the three Rakai Health Sciences Program  
104 (RHSP)-affiliated clinics were also eligible to participate in the study. Health workers were  
105 selected based on recommendations from RHSP staff.

106

### 107 *Procedures*

108

109 The majority of IDIs were conducted in Luganda by experienced RHSP qualitative data  
110 collectors, including authors R.N. and D.I.. Four IDIs with health workers were conducted in  
111 English by author N.S.W.. All participants provided informed consent. Four interviews were  
112 conducted in-person in March 2020, while all subsequent interviews were carried out via  
113 telephone due to COVID-19 pandemic lockdown restrictions. Participants who completed in-  
114 person interviews provided written consent while participants who completed telephone  
115 interviews provided oral consent.

116

117 Semi-structured interview guides were used and followed a timeline representing the  
118 HIV care continuum, starting from before HIV diagnosis and moving through retention in care.  
119 Participants were asked about the experiences of people living with HIV in their community, and  
120 not about their personal experiences. Specifically, they were asked about the problems related  
121 to emotions, feelings, thinking, or mental health that people who have HIV might experience at  
122 each step along the timeline. All interviews were audio recorded. All interviews were transcribed  
123 and interviews conducted in Luganda were translated into English.

124

### 125 *Analysis*

126

127 Content analysis was used as the analytical approach [24]. A codebook was initially  
128 developed by N.S.W. based on the interview guide and further refined through reading and re-  
129 reading of the transcripts, initial coding, and analytic memoing. Codes and interpretations were  
130 shared with the data collection team and study investigators throughout the analysis process for  
131 input, feedback, and refinement. N.S.W. coded all transcripts using the final version of the  
132 codebook. Issues discussed in the interviews were grouped by step of the HIV care continuum  
133 and further categorized by specific stressors or mental health problems at each step. Findings  
134 were examined and compared based on sampling stratifications and participant category for the  
135 exploration of similarities and differences across these different dimensions..

136

137 The study was approved by the Institutional Review Boards of the Johns Hopkins Bloomberg  
138 School of Public Health, The Research and Ethics Committee of the Ugandan Virus Research  
139 Institute, and the Uganda National Council on Science and Technology.

140

## 141 **RESULTS**

142

143 The sample included 20 people living with HIV (n=11 women, n=9 men; n=11 diagnosed  
144 ≤18 months ago, n=9 diagnosed >18 months ago) and 10 health workers (n=5 nurses, n=3 HIV  
145 counsellors, n=2 peer health workers). Moving along the HIV care continuum, participants  
146 described factors shaping psychological distress, mental health and resulting mental health  
147 outcomes at the different stages of the continuum. Findings are presented by stages of HIV care  
148 continuum with exemplary quotes. Figure 1 shows an overall summary of findings.

149

150 **Figure 1. Descriptors of Mental Health and Distress, Drivers of Distress, and Mitigation or**  
 151 **Treatment Approaches**

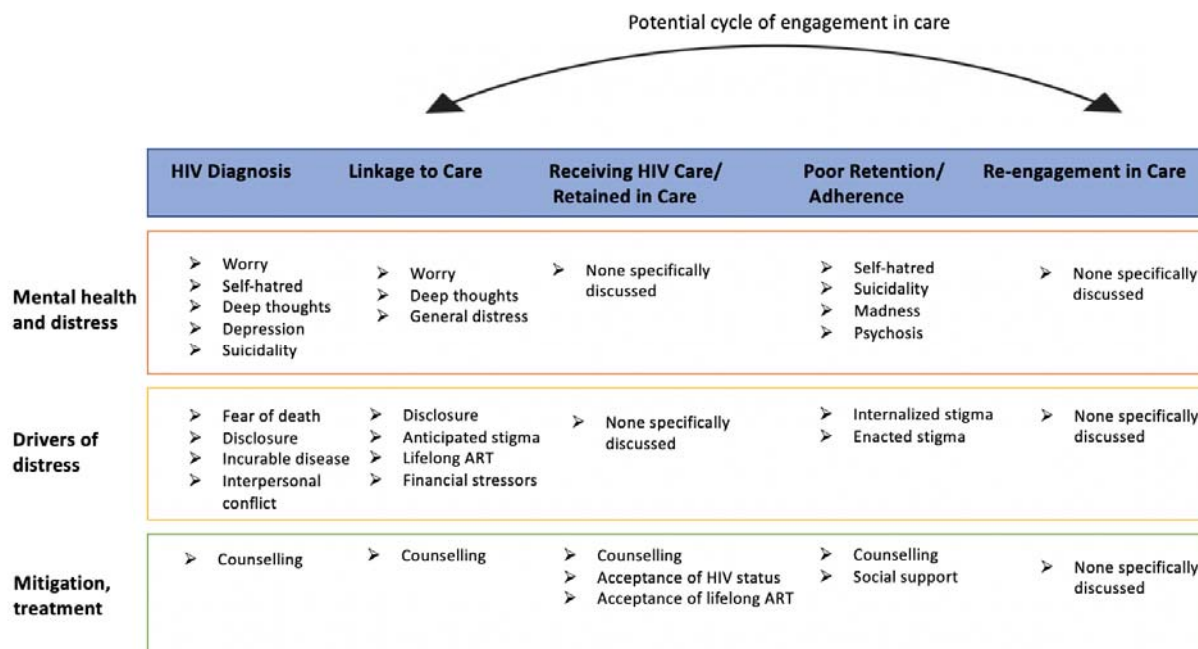

152  
 153 *HIV diagnosis*

154  
 155 Many participants felt that prior to HIV testing, people living with HIV did not experience  
 156 mental health problems, although the stressors of daily life regardless of HIV status were always  
 157 present. At the time of diagnosis, all but one participant said that people living with HIV  
 158 experience a range of strong emotions with potential mental health impacts. Prominent  
 159 throughout interviews at the time of HIV diagnosis was the fear of death and the idea that HIV is  
 160 a death sentence, which in turn could cause mental health issues, as described by a peer health  
 161 worker:

162  
 163 *If you had just provided HIV positive test results to the client, this person asks*  
 164 *him or herself what to do next, and this causes depression. It is not easy to*  
 165 *accept it...secondly, a person starts thinking about his or her future life, and how*

166 *to stay alive. Thirdly, he or she will say 'nkomye' [this is the end of my life], and*  
167 *this makes an individual get worried. This person assumes that being HIV*  
168 *positive marks the end of life, and no more chances to live. As the client*  
169 *continues to cry, he or she says, 'this is the end of my life, how should I survive.'*

170  
171 Fear of death was sometimes described as causing someone to experience *okwenyamira*  
172 (translated as deep or many thoughts). Other feelings of fear could be driven by concerns about  
173 HIV disclosure and worry about not being able to care for children/family, as described by a man  
174 diagnosed with HIV  $\leq 18$  months ago: *"If someone has tested and found HIV positive...you get*  
175 *deep thoughts knowing that it is the end of your life."* These concerns, including having to  
176 disclose one's HIV status led to immediate distress over the idea of having to initiate ART and  
177 the tradeoffs between initiating ART or not.

178  
179 Some participants said that self-hatred and suicidal thoughts could follow an HIV diagnosis,  
180 as many newly diagnosed individuals were reported to grapple with the idea of a lifelong  
181 disease. *"After some people are diagnosed with HIV, they start hating themselves. He/she might*  
182 *be there and starts thinking of taking poison and dying. After all, I will not be cured."* (Female,  
183 diagnosed  $>18$  months ago). Many participants, particularly those who had been diagnosed in  
184 the past 18 months, said that worry and anxiety over having to either disclose to others or  
185 conceal their HIV status was prominent at the time of diagnosis.

186  
187 *Linkage to Care*

188  
189 Most participants talked about how the time leading up to or at ART initiation was a period  
190 of significant distress. Reasons for this were multi-faceted, with fear about inadvertent status  
191 disclosure and stigma as prominent drivers of worry (*okweraliikirira*) and deep thoughts



192 (okwenyamira). Anticipated stigma from family and community members because of recent HIV  
193 diagnosis in advance of ART initiation was more commonly talked about by participants more  
194 recently diagnosed with , and enacted stigma was only raised by this group, as described by a  
195 woman, diagnosed with HIV  $\leq 18$  months ago:

196  
197 *A family member can see you taking HIV medicine and begins telling people that*  
198 *“so and so is taking ARVs”. When you get to know that -- you begin thinking that*  
199 *wherever I go people talk/gossip about me having HIV. You begin feeling*  
200 *uncomfortable or unstable...they make them feel totally uncomfortable. This*  
201 *makes you be in deep thoughts.*

202  
203 Fear of side effects, having to take a daily pill, and worry about needing money to eat well  
204 while taking ART and to get to the clinic were other commonly mentioned causes of distress at  
205 the time of ART initiation. Economic difficulties were discussed in general as a source of stress  
206 in all people’s lives, but compounded for people living with HIV because of having to access  
207 care and eat well when on ART.

208  
209 While a few participants felt that people living with HIV may not experience any mental  
210 health issues in the time leading up to ART initiation, many described post-test counselling or  
211 on-going counselling leading up to or at the time of ART initiation as an important way of  
212 alleviating emotional distress following HIV diagnosis. *“If it is not for intensive counseling that*  
213 *organizations and government or the ministry have put in place to be given to people [recently*  
214 *diagnosed with HIV], maybe these tendencies of suicide would be many.”* (HIV Counsellor)

215  
216 ***Receiving HIV Care, Retention in Care, and Viral Suppression***

217

218 Overall participants felt that individuals who were receiving HIV care, adherent, and  
219 retained in care did not experience many mental health problems in large part because they had  
220 been able to receive counselling, accept their diagnosis, and come to terms with lifelong ART.  
221 When discussing mental health-related reasons that people living with HIV might stop taking  
222 ART or have trouble adhering, a number of participants said that self-hatred could be a catalyst:  
223 *“If you hate yourself [okwekyawa], even if you fetch the drugs, you are not going to take it*  
224 *because you are fed up. Someone who hates themselves doesn’t come for their drugs.”*  
225 (Female, diagnosed >18 months ago). A number of participants talked about discontinuing  
226 treatment as a death wish or akin to being suicidal. Both health workers and people living with  
227 HIV said that the downstream impact of discontinuing ART was madness or psychosis,  
228 sometimes attributed to untreated HIV-infection. *“If a person stops HIV care and treatment*  
229 *completely, it results in ‘okufa’ [death] or ‘okwagala okwetta’ [suicide attempt]. He/she first*  
230 *experiences ‘kulaluka’ [madness] and then later dies. You cannot stop HIV care and treatment*  
231 *knowing that you can only live by ARVs. ARVs are your life.”* (Female, diagnosed >18 months  
232 ago). Many participants said that people living with HIV who were experiencing mental distress  
233 and struggling with adherence and retention as a result needed counselling at the clinic and/or  
234 social support from family members and others living with HIV to mitigate these problems and  
235 described how through counselling and support people living with HIV could become “strong”  
236 and overcome distress.

237  
238 When talking about people living with HIV who had been re-engaged in care, participants  
239 had mixed opinions about what mental health problems might be experienced. Some  
240 participants felt that once someone had re-engaged, they were not experiencing problems or  
241 had overcome any mental health issues that would have been a barrier to re-engagement. A  
242 nurse said, *“Indeed, I do not know because I would not expect the client who had re-started*  
243 *taking ART to face any [emotional or mental health] problem. The client has already explained*

244 *that he or she is now re-starting the HIV treatment, I do not see any likely problem this client*  
245 *would face.*” However, others felt that the problems experienced at the HIV diagnosis or  
246 treatment initiation timepoints might reoccur.

247

## 248 **DISCUSSION**

249

250 This qualitative study explored how people living with HIV in South-Central, Uganda  
251 experience psychological distress and poor mental health as they encounter different steps and  
252 progress along the HIV care continuum. Overall, participants felt that poor mental health was  
253 rare prior to testing and at the time of HIV testing participants described varying types of  
254 distress. Initiating ART caused worry, fear, and deep thoughts, with anticipated HIV-related  
255 stigma as a prominent driver. Those who struggled with adherence or dropped out of care were  
256 thought to experience self-hatred and be potentially suicidal, with possible long-term impacts of  
257 madness or psychosis. When people living with HIV re-engaged in care, participant responses  
258 were mixed as to whether the cycle of stressors along the continuum and their impacts on  
259 mental health would repeat upon re-starting ART.

260

261 The 95-95-95 goals have importantly led to the scale-up of HIV testing and adoption of  
262 differentiated approaches such as client or provider-initiated, community-based, or self-  
263 testing.[25] However, the relationship between mental health and HIV diagnosis is complex, with  
264 little empirical data from SSA to demonstrate whether poor mental health precedes HIV  
265 infection, leads to a delay in HIV testing, or is the result of an HIV diagnosis.[11] Our findings  
266 suggest that HIV diagnosis can prompt psychological distress that may lead to poor mental  
267 health, and anticipation of a positive HIV diagnosis or fear of diagnosis may also drive distress  
268 prior to engagement in the care continuum. In our study, post-test counselling was felt to be one

269 important way to alleviate distress following HIV-diagnosis. Client-centered post-test counselling  
270 that is tailored to the needs of a newly diagnosed individual has been recommended by the  
271 WHO, although guidance on post-test counselling content is generally focused on preparation  
272 for ART and linkage to care,[25] leaving a critical gap for addressing the potential immediate  
273 need for psychosocial support following a new HIV diagnosis which may further complicate an  
274 individual progressing to the linkage to care step. Neither recent WHO or Ugandan post-test  
275 counselling guidelines emphasize psychosocial support or assessment for mental health  
276 problems immediately following HIV diagnosis as part of post-test counselling.[25, 26]  
277 Incorporating basic psychosocial support into post-test counselling following HIV diagnosis may  
278 help mitigate distress and/or prevent worsening distress that could lead to mental health issues.  
279 Additionally, screening for poor mental health at other steps of the continuum (such as linkage-  
280 to-care) may identify individuals to prevent development of mental disorder.

281  
282 Prompt initiation of ART is important ensure the health and wellbeing of people living with  
283 HIV and prevent onward transmission, but our findings suggest that rapid ART initiation may be  
284 accompanied by multifaceted psychological stressors that are experienced during linkage to  
285 care, supporting the idea that attention to mental health for those in need of additional support  
286 may be critical to their progression along the continuum.[12] In the era of UTT, more intensive  
287 intervention for individuals experiencing poor mental health and distress around ART initiation  
288 may be warranted to aid in progression through this critical timepoint in HIV care. Case  
289 management, often peer-led, that includes psychosocial support has been used as an approach  
290 to improve linkage to care and increase the likelihood of ART initiation.[27] Additionally, our  
291 findings demonstrate that anticipated or enacted stigma may contribute to the likelihood of  
292 psychological distress at the linkage to care step. This is in line with a substantial body of  
293 literature demonstrating associations between HIV-related stigma (anticipated, enacted,  
294 internalized) and poor mental health for people living with HIV.[12, 20] In our study anticipated

295 and enacted stigma were raised primarily by participants who were more recently diagnosed  
296 with HIV ( $\leq 18$  months ago), suggesting that individuals may be actively grappling with concerns  
297 around stigma and disclosure based on the recency of their diagnosis and therefore find these  
298 issues to be critical. Given the influential role that HIV-related stigma plays both for mental  
299 health and in HIV care and treatment outcomes for people living with HIV,[20] and that  
300 participants in this study who highlighted stigma the most were more recently diagnosed,  
301 attention to stigma early on in the continuum of care may be warranted.

302  
303 The relationship between common mental disorders or symptoms of common mental  
304 disorders and adherence to ART and/or engagement in HIV care has been well studied.[12, 28-  
305 30] Our findings further support that psychological distress and poor mental health may be key  
306 contributing factors for individuals who struggle with adherence and retention in care.  
307 Participants in our study were divided on whether re-engagement in care meant an individual  
308 would not experience or was no longer experiencing poor mental health or distress, or whether  
309 having to progress again through the HIV care continuum would cause someone to experience  
310 psychological distress and potentially poor mental health outcomes all over again. Research on  
311 mental health and re-engagement in HIV care is scant. A US-based study found that people  
312 living with HIV who had a mental disorder were less likely return to care after a single HIV visit  
313 followed by a subsequent 6-month gap in care.[31] A study among people living with HIV re-  
314 engaging in care in Argentina found that 21% reported suicidal ideation in the past week.[32]  
315 We were unable to identify any literature from sub-Saharan Africa examining mental health  
316 among individuals who return to care, but our findings suggest that this may be a time when  
317 mental health stressors are renewed and psychosocial support is particularly needed.  
318 Individuals re-engaging in care may benefit from more intensive mental health screening,  
319 support, and follow-up.

320

321 Suicidal ideation and/or attempt was discussed frequently by our participants – particularly  
322 in the HIV diagnosis and linkage to care steps, and for people who had disengaged with care. A  
323 systematic review and meta-analysis of people living with HIV in Africa found prevalence of  
324 suicidal ideation to be 21.7% and a prevalence of suicide attempt of 11.1%.[33] This review did  
325 not examine timing of ideation and/or attempt, but our findings suggest these may occur across  
326 the continuum of care. Depression is associated with suicidality among people living with HIV in  
327 Africa.[34-37] While the Ugandan HIV guidelines state that annual screening for depression  
328 should occur within the healthcare setting for people living with HIV,[38] the reality of limited  
329 resources both to conduct screening and to refer people living with HIV in need of further  
330 support are likely barriers to the implementation of these guidelines. Furthermore, health  
331 workers may not be adequately trained to manage comments about suicide attempts or ideation  
332 and address them in the context of potential underlying mental disorders.

333  
334 This study is not without limitations. First, participants were not asked about their personal  
335 experiences or sampled based on mental health status, but rather asked to reflect generally on  
336 the experiences of people living with HIV in their communities. This limits our ability to explore  
337 lived personal experiences and trajectories along the care continuum however may have  
338 allowed people to speak more freely about stigmatized issues. Despite this limitation, this  
339 approach does allow for an exploration of the overall perceptions of what participants see as the  
340 issues experienced in their communities as opposed to simply an individual experience.  
341 Furthermore, a number of participants chose to share their personal experiences when  
342 providing examples of mental health challenges along the HIV care continuum. Second, data  
343 were collected in predominantly rural areas which may limit transferability of the findings to  
344 urban settings. Third, the majority of interviews were conducted via telephone, which may have  
345 limited who was able to participate based on telephone access. However, the RCCS from which

346 participants were drawn has procedures in place to obtain reliable telephone contact information  
347 from all participants, and this may have mostly mitigated this concern in our sample.

348

## 349 **CONCLUSION**

350       These findings suggest mental health problems experienced by people living with HIV are  
351 not necessarily uniform along the HIV care continuum and may require nuanced intervention  
352 approaches. With expanded HIV testing campaigns and UTT policies, tailored and targeted  
353 interventions for psychosocial support remain critical. Given the important and persistent role of  
354 anticipated or enacted stigma as a driver of poor mental health found in this study and  
355 throughout the literature,[14] continued attention is warranted on the implementation of  
356 evidence-based approaches to decrease stigma at the community and individual levels. Finally,  
357 more research is needed to understand the mental health needs of individuals who are returning  
358 to HIV care. Careful consideration of both the catalysts for psychological distress and resulting  
359 poor mental health at each step along the HIV care continuum are critical to ensuring the best  
360 possible outcomes for people living with HIV throughout their HIV care and treatment.

361

362

363 **Acknowledgements**

364 The authors wish to thank the participants who provided their insights and time to this study. We  
365 also thank the broader Rakai Health Sciences Program Social and Behavioral Studies team who  
366 supported this work.

367



## 368 References

- 369
- 370 [1] L. Dwyer-Lindgren *et al.*, "Mapping HIV prevalence in sub-Saharan Africa between  
371 2000 and 2017," *Nature*, vol. 570, no. 7760, pp. 189-193, Jun 2019, doi: 10.1038/s41586-  
372 019-1200-9.
- 373 [2] UNAIDS. "Understanding Fast-Track: Accelerating Action to End the AIDS Epidemic  
374 by 2030."  
375 [https://www.unaids.org/sites/default/files/media\\_asset/201506\\_JC2743\\_Understanding\\_F](https://www.unaids.org/sites/default/files/media_asset/201506_JC2743_Understanding_FastTrack_en.pdf)  
376 [astTrack\\_en.pdf](https://www.unaids.org/sites/default/files/media_asset/201506_JC2743_Understanding_FastTrack_en.pdf) (accessed March 29, 2021).
- 377 [3] UNAIDS. "Country Fact Sheet - Uganda."  
378 <http://www.unaids.org/en/regionscountries/countries/uganda> (accessed April 3, 2019).
- 379 [4] L. W. Chang *et al.*, "Heterogeneity of the HIV epidemic in agrarian, trading, and fishing  
380 communities in Rakai, Uganda: an observational epidemiological study," *Lancet HIV*,  
381 vol. 3, no. 8, pp. e388-e396, Aug 2016, doi: 10.1016/S2352-3018(16)30034-0.
- 382 [5] M. K. Grabowski *et al.*, "The role of viral introductions in sustaining community-based  
383 HIV epidemics in rural Uganda: evidence from spatial clustering, phylogenetics, and  
384 egocentric transmission models," *PLoS Med*, vol. 11, no. 3, p. e1001610, Mar 2014, doi:  
385 10.1371/journal.pmed.1001610.
- 386 [6] E. S. Kay, D. S. Batey, and M. J. Mugavero, "The HIV treatment cascade and care  
387 continuum: updates, goals, and recommendations for the future," *AIDS Res Ther*, vol. 13,  
388 p. 35, 2016, doi: 10.1186/s12981-016-0120-0.
- 389 [7] M. E. Herce, B. H. Chi, R. C. Liao, and C. J. Hoffmann, "Re-thinking Linkage to Care in  
390 the Era of Universal Test and Treat: Insights from Implementation and Behavioral  
391 Science for Achieving the Second 90," *AIDS Behav*, vol. 23, no. Suppl 2, pp. 120-128,  
392 Sep 2019, doi: 10.1007/s10461-019-02541-5.
- 393 [8] R. Brandt, "The mental health of people living with HIV/AIDS in Africa: a systematic  
394 review," *Afr J AIDS Res*, vol. 8, no. 2, pp. 123-33, Jun 2009, doi:  
395 10.2989/AJAR.2009.8.2.1.853.
- 396 [9] D. Chibanda, L. Benjamin, H. A. Weiss, and M. Abas, "Mental, neurological, and  
397 substance use disorders in people living with HIV/AIDS in low- and middle-income  
398 countries," *J Acquir Immune Defic Syndr*, vol. 67 Suppl 1, pp. S54-67, Sep 1 2014, doi:  
399 10.1097/QAI.0000000000000258.
- 400 [10] K. M. Narayan *et al.*, "HIV and noncommunicable disease comorbidities in the era of  
401 antiretroviral therapy: a vital agenda for research in low- and middle-income country  
402 settings," *J Acquir Immune Defic Syndr*, vol. 67 Suppl 1, pp. S2-7, Sep 1 2014, doi:  
403 10.1097/QAI.0000000000000267.
- 404 [11] A. M. Parcesepe *et al.*, "Mental health and HIV: research priorities related to the  
405 implementation and scale up of 'treat all' in sub-Saharan Africa," *J Virus Erad*, vol. 4, no.  
406 Suppl 2, pp. 16-25, Nov 15 2018. [Online]. Available:  
407 <https://www.ncbi.nlm.nih.gov/pubmed/30515310>.
- 408 [12] R. H. Remien, M. J. Stirratt, N. Nguyen, R. N. Robbins, A. N. Pala, and C. A. Mellins,  
409 "Mental health and HIV/AIDS: the need for an integrated response," *AIDS*, vol. 33, no. 9,  
410 pp. 1411-1420, Jul 15 2019, doi: 10.1097/QAD.0000000000002227.
- 411 [13] Z. Shubber *et al.*, "Patient-Reported Barriers to Adherence to Antiretroviral Therapy: A  
412 Systematic Review and Meta-Analysis," *PLoS Med*, vol. 13, no. 11, p. e1002183, Nov  
413 2016, doi: 10.1371/journal.pmed.1002183.

- 414 [14] S. Rueda *et al.*, "Examining the associations between HIV-related stigma and health  
415 outcomes in people living with HIV/AIDS: a series of meta-analyses," *BMJ Open*, vol. 6,  
416 no. 7, p. e011453, Jul 13 2016, doi: 10.1136/bmjopen-2016-011453.
- 417 [15] L. A. Chambers *et al.*, "Stigma, HIV and health: a qualitative synthesis," *BMC Public*  
418 *Health*, vol. 15, p. 848, Sep 3 2015, doi: 10.1186/s12889-015-2197-0.
- 419 [16] R. Mayston, E. Kinyanda, N. Chishinga, M. Prince, and V. Patel, "Mental disorder and  
420 the outcome of HIV/AIDS in low-income and middle-income countries: a systematic  
421 review," *AIDS*, vol. 26 Suppl 2, pp. S117-35, Dec 2012, doi:  
422 10.1097/QAD.0b013e32835bde0f.
- 423 [17] N. Croome, M. Ahluwalia, L. D. Hughes, and M. Abas, "Patient-reported barriers and  
424 facilitators to antiretroviral adherence in sub-Saharan Africa," *AIDS*, vol. 31, no. 7, pp.  
425 995-1007, Apr 24 2017, doi: 10.1097/QAD.0000000000001416.
- 426 [18] S. Musisi, G. J. Wagner, B. Ghosh-Dastidar, N. Nakasujja, A. Dickens, and E. Okello,  
427 "Depression and sexual risk behaviour among clients about to start HIV antiretroviral  
428 therapy in Uganda," *Int J STD AIDS*, vol. 25, no. 2, pp. 130-7, Feb 2014, doi:  
429 10.1177/0956462413495186.
- 430 [19] G. J. Wagner, B. Ghosh-Dastidar, M. E. Slaughter, D. Akena, N. Nakasujja, and S.  
431 Musisi, "Changes in condom use during the first year of HIV treatment in Uganda and  
432 the relationship to depression," *Ann Behav Med*, vol. 48, no. 2, pp. 175-83, Oct 2014, doi:  
433 10.1007/s12160-013-9586-3.
- 434 [20] J. C. Kane *et al.*, "A scoping review of health-related stigma outcomes for high-burden  
435 diseases in low- and middle-income countries," *BMC Med*, vol. 17, no. 1, p. 17, Feb 15  
436 2019, doi: 10.1186/s12916-019-1250-8.
- 437 [21] R. R. Lilian, K. Rees, J. A. McIntyre, H. E. Struthers, and R. P. H. Peters, "Same-day  
438 antiretroviral therapy initiation for HIV-infected adults in South Africa: Analysis of  
439 routine data," *PLoS One*, vol. 15, no. 1, p. e0227572, 2020, doi:  
440 10.1371/journal.pone.0227572.
- 441 [22] B. Kerschberger, A. Boulle, R. Kuwengwa, I. Ciglenecki, and M. Schomaker, "The  
442 Impact of Same-Day Antiretroviral Therapy Initiation under the WHO Treat-All Policy,"  
443 *Am J Epidemiol*, Feb 12 2021, doi: 10.1093/aje/kwab032.
- 444 [23] N. S. West, Poku, O., Murray, S., Hutton, H., Surkan, P., Kennedy, C.E., "The Mental  
445 Health of Adults Living with HIV in Sub-Saharan Africa Along the HIV Care  
446 Continuum: A Systematic Review of the Literature," Johns Hopkins Bloomberg School  
447 of Public Health, 2021.
- 448 [24] S. Elo and H. Kyngas, "The qualitative content analysis process," *J Adv Nurs*, vol. 62, no.  
449 1, pp. 107-15, Apr 2008, doi: 10.1111/j.1365-2648.2007.04569.x.
- 450 [25] WHO. "Consolidated Guidelines On HIV Testing Services for a Changing Epidemic."  
451 <https://www.who.int/publications/i/item/978-92-4-155058-1> (accessed April 6, 2021).
- 452 [26] Uganda Ministry of Health, "National HIV Testing Services Policy and Implementation  
453 Guidelines," Kampala 2016.
- 454 [27] B. A. Bunda and I. V. Bassett, "Reaching the second 90: the strategies for linkage to care  
455 and antiretroviral therapy initiation," *Curr Opin HIV AIDS*, vol. 14, no. 6, pp. 494-502,  
456 Nov 2019, doi: 10.1097/COH.0000000000000579.
- 457 [28] S. M. Bulsara, M. L. Wainberg, and T. R. O. Newton-John, "Predictors of Adult  
458 Retention in HIV Care: A Systematic Review," *AIDS Behav*, vol. 22, no. 3, pp. 752-764,  
459 Mar 2018, doi: 10.1007/s10461-016-1644-y.

- 460 [29] C. Bernard, F. Dabis, and N. de Rekeneire, "Prevalence and factors associated with  
461 depression in people living with HIV in sub-Saharan Africa: A systematic review and  
462 meta-analysis," *PLoS One*, vol. 12, no. 8, p. e0181960, 2017, doi:  
463 10.1371/journal.pone.0181960.
- 464 [30] J. Wykowski, C. G. Kemp, J. Velloza, D. Rao, and P. K. Drain, "Associations Between  
465 Anxiety and Adherence to Antiretroviral Medications in Low- and Middle-Income  
466 Countries: A Systematic Review and Meta-analysis," *AIDS Behav*, vol. 23, no. 8, pp.  
467 2059-2071, Aug 2019, doi: 10.1007/s10461-018-02390-8.
- 468 [31] C. O. Cunningham, J. Buck, F. M. Shaw, L. S. Spiegel, M. Heo, and B. D. Agins,  
469 "Factors associated with returning to HIV care after a gap in care in New York State," *J*  
470 *Acquir Immune Defic Syndr*, vol. 66, no. 4, pp. 419-27, Aug 1 2014, doi:  
471 10.1097/QAI.000000000000171.
- 472 [32] L. N. Mandell *et al.*, "Suicidal Ideation Among Adults Re-engaging in HIV Care in  
473 Argentina," *AIDS Behav*, vol. 23, no. 12, pp. 3427-3434, Dec 2019, doi: 10.1007/s10461-  
474 019-02526-4.
- 475 [33] M. Necho, M. Tsehay, and Y. Zenebe, "Suicidal ideation, attempt, and its associated  
476 factors among HIV/AIDS patients in Africa: a systematic review and meta-analysis  
477 study," *Int J Ment Health Syst*, vol. 15, no. 1, p. 13, Jan 23 2021, doi: 10.1186/s13033-  
478 021-00437-3.
- 479 [34] R. O. Shittu, B. A. Issa, G. T. Olanrewaju, A. O. Mahmoud, L. O. Odeigah, and A. G.  
480 Sule, "Social Determinants of Depression: Social Cohesion, Negative Life Events, and  
481 Depression Among People Living with HIV/Aids in Nigeria, West Africa," *Int J MCH*  
482 *AIDS*, vol. 2, no. 2, pp. 174-81, 2014. [Online]. Available:  
483 <https://www.ncbi.nlm.nih.gov/pubmed/27621970>.
- 484 [35] E. H. Gebremariam, M. M. Reta, Z. Nasir, and F. Z. Amdie, "Prevalence and Associated  
485 Factors of Suicidal Ideation and Attempt among People Living with HIV/AIDS at  
486 Zewditu Memorial Hospital, Addis Ababa, Ethiopia: A Cross-Sectional Study,"  
487 *Psychiatry J*, vol. 2017, p. 2301524, 2017, doi: 10.1155/2017/2301524.
- 488 [36] H. Bitew, G. Andargie, A. Tadesse, A. Belete, W. Fekadu, and T. Mekonen, "Suicidal  
489 Ideation, Attempt, and Determining Factors among HIV/AIDS Patients, Ethiopia,"  
490 *Depress Res Treat*, vol. 2016, p. 8913160, 2016, doi: 10.1155/2016/8913160.
- 491 [37] C. O. Egbe, P. S. Dakum, E. Ekong, B. A. Kohrt, J. G. Minto, and C. J. Ticao,  
492 "Depression, suicidality, and alcohol use disorder among people living with HIV/AIDS in  
493 Nigeria," *BMC Public Health*, vol. 17, no. 1, p. 542, Jun 2 2017, doi: 10.1186/s12889-  
494 017-4467-5.
- 495 [38] Uganda Ministry of Health, "Consolidated Guidelines for the Prevention and Treatment  
496 of HIV and AIDS in Uganda," Kampala, 2020.
- 497
